# Supplementary material
Source: publisher figshare collection journal article supplement (https://frontiersin.figshare.com/ndownloader/files/21521781)
Supplement: Supplementary file 1 [file 21521781]

### Supplementary Material - Tables

Table S1: Percent (%) of survey respondents that had personally experienced specific issues from large carnivore species in southwestern Alberta (n = 116).

|              | Percent (%) of Respondents    |                                     |                       |               |                     |
|--------------|-------------------------------|-------------------------------------|-----------------------|---------------|---------------------|
|              | Personal/<br>Family<br>Safety | Livestock<br>Depredation/<br>Stress | Grain/Feed<br>Damages | Pet<br>Safety | Property<br>Damages |
| Grizzly Bear | 50.0                          | 44.8                                | 24.1                  | 19.0          | 26.7                |
| Black Bear   | 44.8                          | 18.1                                | 15.5                  | 22.4          | 23.3                |
| Wolf         | 8.6                           | 35.3                                | 0.0                   | 12.9          | 2.6                 |
| Cougar       | 32.8                          | 27.6                                | 0.0                   | 26.7          | 0.9                 |

Table S2: Survey respondent ranking of concerns associated with living with large carnivore species in southwestern Alberta. Concerns are ranked from 1 through 5 with 1 being highest concern and 5 being least concern. Respondents were told to use each number only once. Results are presented as the percent of respondents identifying the importance of a given issue (n = 116).

|                              | Ranking - Percent (%) of Respondents |      |      |      |      |      |
|------------------------------|--------------------------------------|------|------|------|------|------|
|                              | 1                                    | 2    | 3    | 4    | 5    | N/A  |
| Personal/Family safety       | 56.0                                 | 18.1 | 11.2 | 4.3  | 2.6  | 7.8  |
| Grain/feed damage or loss    | 2.6                                  | 12.1 | 11.2 | 13.8 | 25.0 | 35.3 |
| Pet safety                   | 8.6                                  | 20.7 | 23.3 | 12.1 | 18.1 | 17.2 |
| Livestock depredation/stress | 19.8                                 | 33.6 | 16.4 | 6.0  | 2.6  | 21.6 |
| Property Damage              | 6.0                                  | 7.8  | 20.7 | 36.2 | 12.9 | 16.4 |

Table S3: Percent of respondents indicating whether they report various carnivore interactions always, more than half the time, less than half the time, or never.

| Reason for calling                   | Percent (%) of respondents |                 |                 |       |
|--------------------------------------|----------------------------|-----------------|-----------------|-------|
|                                      | Always                     | > half the time | < half the time | Never |
| Safety concerns (n = 95)             | 30.9                       | 14.9            | 21.3            | 33.0  |
| Stored grain or feed damage (n = 51) | 29.4                       | 7.8             | 13.7            | 49.0  |
| Livestock Depredation (n = 52)       | 46.2                       | 25.0            | 11.5            | 17.3  |
